# Supplementary material for: Association between daytime napping and obesity in Chinese middle-aged and older adults
Source: PubMed Central journal article supplement (PMC7719355; doi:10.7189/jogh.10.020804), 2020-12
Supplement: jogh-10-020804-s001.pdf [file jogh-10-020804-s001.pdf]

**Table S1. Comparison of the final sample after exclusion with the sample before exclusion based on invalid data of BMI and napping<sup>†</sup>**

| Variable                                     | Final sample after exclusion |                      | Sample before exclusion based on invalid data of BMI and napping |                      |
|----------------------------------------------|------------------------------|----------------------|------------------------------------------------------------------|----------------------|
|                                              | Number                       | Mean/Percentage (SD) | Number                                                           | Mean/Percentage (SD) |
| <b>Demographic and Socio-economic status</b> |                              |                      |                                                                  |                      |
| <b>Age</b>                                   | 14 685                       | 60.32±9.66           | 4765                                                             | 60.17±11.54          |
| <b>Community type (n=14 647)</b>             |                              |                      | <b>Community type (n=4730)</b>                                   |                      |
| Rural                                        | 10 928                       | 74.6                 | 3112                                                             | 65.8                 |
| Urban                                        | 3719                         | 25.4                 | 1618                                                             | 34.2                 |
| <b>Sex (n=14 685)</b>                        |                              |                      | <b>Sex (n=4765)</b>                                              |                      |
| Men                                          | 6992                         | 47.6                 | 2499                                                             | 52.4                 |
| Women                                        | 7693                         | 52.4                 | 2266                                                             | 47.6                 |
| <b>Marital status (n=14 685)</b>             |                              |                      | <b>Marital status (n=4762)</b>                                   |                      |
| Other                                        | 2540                         | 17.3                 | 1188                                                             | 24.9                 |
| Cohabited                                    | 12 145                       | 82.7                 | 3574                                                             | 75.1                 |
| <b>Education (n=13 514)</b>                  |                              |                      | <b>Education (n=4278)</b>                                        |                      |
| Illiterate                                   | 6078                         | 45.0                 | 1717                                                             | 40.1                 |
| Primary School                               | 3077                         | 22.8                 | 824                                                              | 19.3                 |
| Middle school or above                       | 4359                         | 32.3                 | 1737                                                             | 40.6                 |
| <b>Annual household income (n=14 685)</b>    |                              |                      | <b>Annual household income (n=4765)</b>                          |                      |
| 0-4000                                       | 4830                         | 32.9                 | 1201                                                             | 25.2                 |
| 4001-25000                                   | 4904                         | 33.4                 | 1482                                                             | 31.1                 |
| >25000                                       | 4951                         | 33.7                 | 2082                                                             | 13.7                 |
| <b>Employment (n=14 673)</b>                 |                              |                      | <b>Employment (n=4602)</b>                                       |                      |
| No                                           | 4647                         | 31.7                 | 2740                                                             | 59.5                 |
| Yes                                          | 10 026                       | 68.3                 | 1862                                                             | 40.5                 |
| <b>Health behaviors</b>                      |                              |                      |                                                                  |                      |
| <b>Alcohol consumption (n=14 677)</b>        |                              |                      | <b>Alcohol consumption (n=4638)</b>                              |                      |
| No                                           | 9464                         | 64.5                 | 2933                                                             | 63.2                 |
| Yes                                          | 5213                         | 35.5                 | 1705                                                             | 36.8                 |
| <b>Smoking (n=14 666)</b>                    |                              |                      | <b>Smoking (n=4655)</b>                                          |                      |
| No                                           | 8275                         | 56.4                 | 2482                                                             | 53.3                 |
| Yes                                          | 6391                         | 43.6                 | 2173                                                             | 46.7                 |
| <b>Nighttime sleep (n=14 510)</b>            |                              |                      | <b>Nighttime sleep (n=3512)</b>                                  |                      |
| <6h                                          | 4425                         | 30.5                 | 1059                                                             | 30.2                 |
| 6-8h                                         | 8676                         | 59.8                 | 2130                                                             | 60.6                 |
| >8h                                          | 1409                         | 9.7                  | 323                                                              | 9.2                  |
| <b>Sleep quality (n=14 599)</b>              |                              |                      | <b>Sleep quality (n=3534)</b>                                    |                      |
| Good                                         | 7545                         | 51.7                 | 1874                                                             | 53.0                 |
| Fair                                         | 2036                         | 13.9                 | 487                                                              | 13.8                 |

| Variable                            | Final sample after exclusion |                      | Sample before exclusion based on invalid data of BMI and napping |                      |
|-------------------------------------|------------------------------|----------------------|------------------------------------------------------------------|----------------------|
|                                     | Number                       | Mean/Percentage (SD) | Number                                                           | Mean/Percentage (SD) |
| Poor                                | 2061                         | 14.1                 | 459                                                              | 13.0                 |
| Bad                                 | 2957                         | 20.3                 | 714                                                              | 20.2                 |
| <b>Physical activity (n=14 685)</b> |                              |                      | <b>Physical activity (n=4765)</b>                                |                      |
| No                                  | 8146                         | 55.5                 | 3216                                                             | 67.5                 |
| Yes                                 | 6539                         | 44.5                 | 1549                                                             | 32.5                 |
| <b>Health-related variables</b>     |                              |                      |                                                                  |                      |
| <b>Hypertension (n=14 671)</b>      |                              |                      | <b>Hypertension (n=3771)</b>                                     |                      |
| No                                  | 10 163                       | 69.3                 | 2845                                                             | 75.4                 |
| Yes                                 | 4508                         | 30.7                 | 926                                                              | 24.6                 |
| <b>Diabetes (n=14 672)</b>          |                              |                      | <b>Diabetes (n=4636)</b>                                         |                      |
| No                                  | 13 281                       | 90.5                 | 4195                                                             | 60.5                 |
| Yes                                 | 1391                         | 9.5                  | 441                                                              | 9.5                  |

† Abbreviations: SD, standard deviation; min, minute; h, hour
